# Supplementary material
Source: PubMed Central journal article supplement (PMC2575903)
Supplement: 90264.2008_1.pdf [file 90264.2008_1.pdf]

**Figure S1**

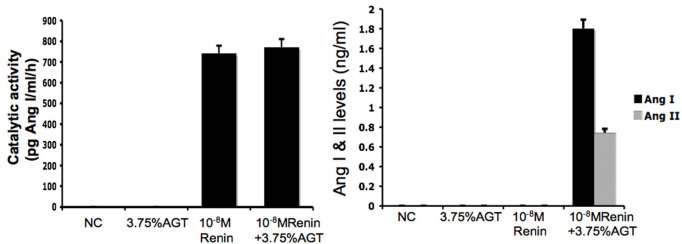

**Figure S1. Active rat renin facilitates angiotensin generation when exogenous AGT is present in cultured VSMCs.** (a) Catalytic activity and (b) Ang I (■) and Ang II generation (▨) of  $10^{-8}$  M recombinant rat renin incubated with VSMCs for 2h in the presence of 3.75% rat AGT serum, detected by RIA and ELISA respectively.
